# Supplementary material for: DBU-Intercalated α-Zirconium Phosphates as Latent Thermal Catalysts in the Reaction of Hexamethylene Diisocyanate and Phenol
Source: MDPI journal article supplement (doi:10.3390/catal11050614), 2021-05-11
Supplement: s1 [file s1]

Archive with 1 entries (1 files):
- catalysts-1202836-SI.pdf
