# Supplementary material for: DBU-Intercalated α-Zirconium Phosphates as Latent Thermal Catalysts in the Reaction of Hexamethylene Diisocyanate and Phenol
Source: MDPI journal article supplement (doi:10.3390/catal11050614), 2021-05-11
Supplement: s1 [file s1 › catalysts-1202836-SI.pdf]

## DBU-intercalated $\alpha$ -zirconium phosphates as latent thermal catalysts in the reaction of hexamethylene diisocyanate and phenol

Figure S1 shows the  $^1\text{H}$ -NMR spectra of a reaction mixture of HDI–phenol with a)  $\alpha$ -ZrP·0.10DBU at 25 °C for 30 min and b)  $\alpha$ -ZrP·0.58DBU at 40 °C for 30 min. A signal due to protons at the *o*-position of the starting phenol was observed at  $\delta$  6.83 corresponding to \*A). In the reaction product of urethane, a signal due to protons at the *m*-position was observed at  $\delta$  7.35 corresponding to \*B). The conversions were determined by the ratio of these two peak areas.

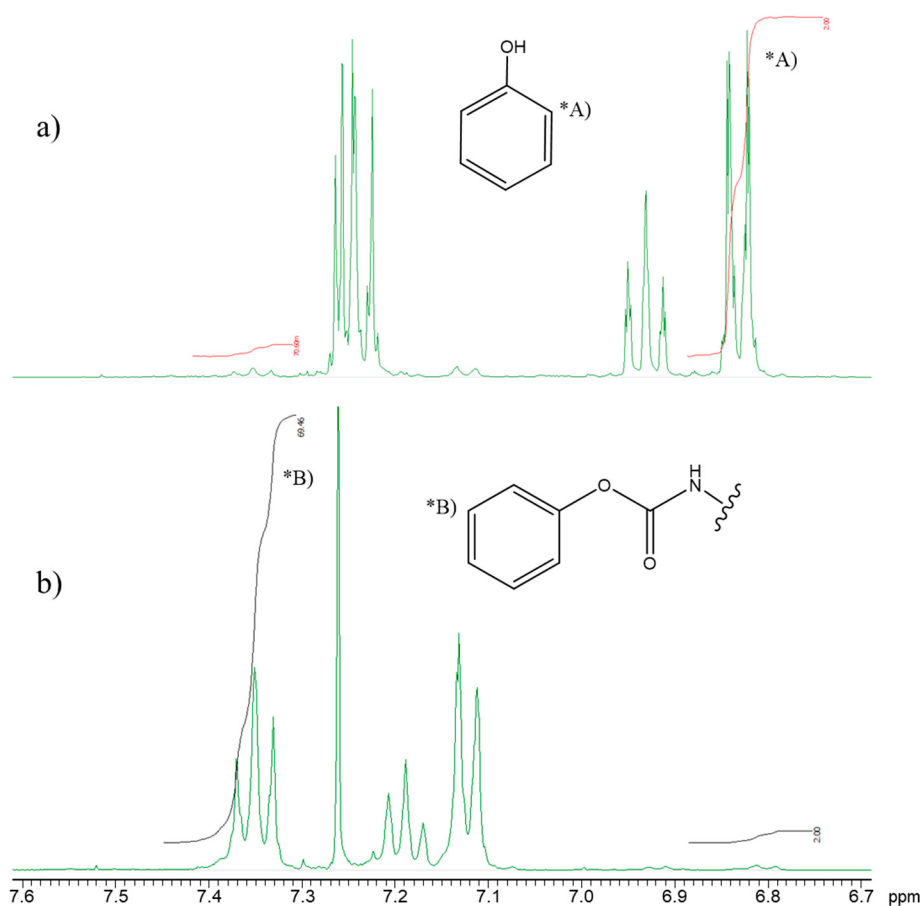

Figure S1. The  $^1\text{H}$ -NMR spectra after the reaction of HDI and phenol with a)  $\alpha$ -ZrP·0.10DBU at 25 °C and b)  $\alpha$ -ZrP·0.58DBU at 40 °C for 30 min.
